# Supplementary material
Source: publisher figshare collection journal article supplement (https://tandf.figshare.com/ndownloader/files/15284513)

**Supplementary Figure S3.** Among injured older adults transported by EMS and dying within one year, the location of death plotted over time by POLST status (n = 1,600).


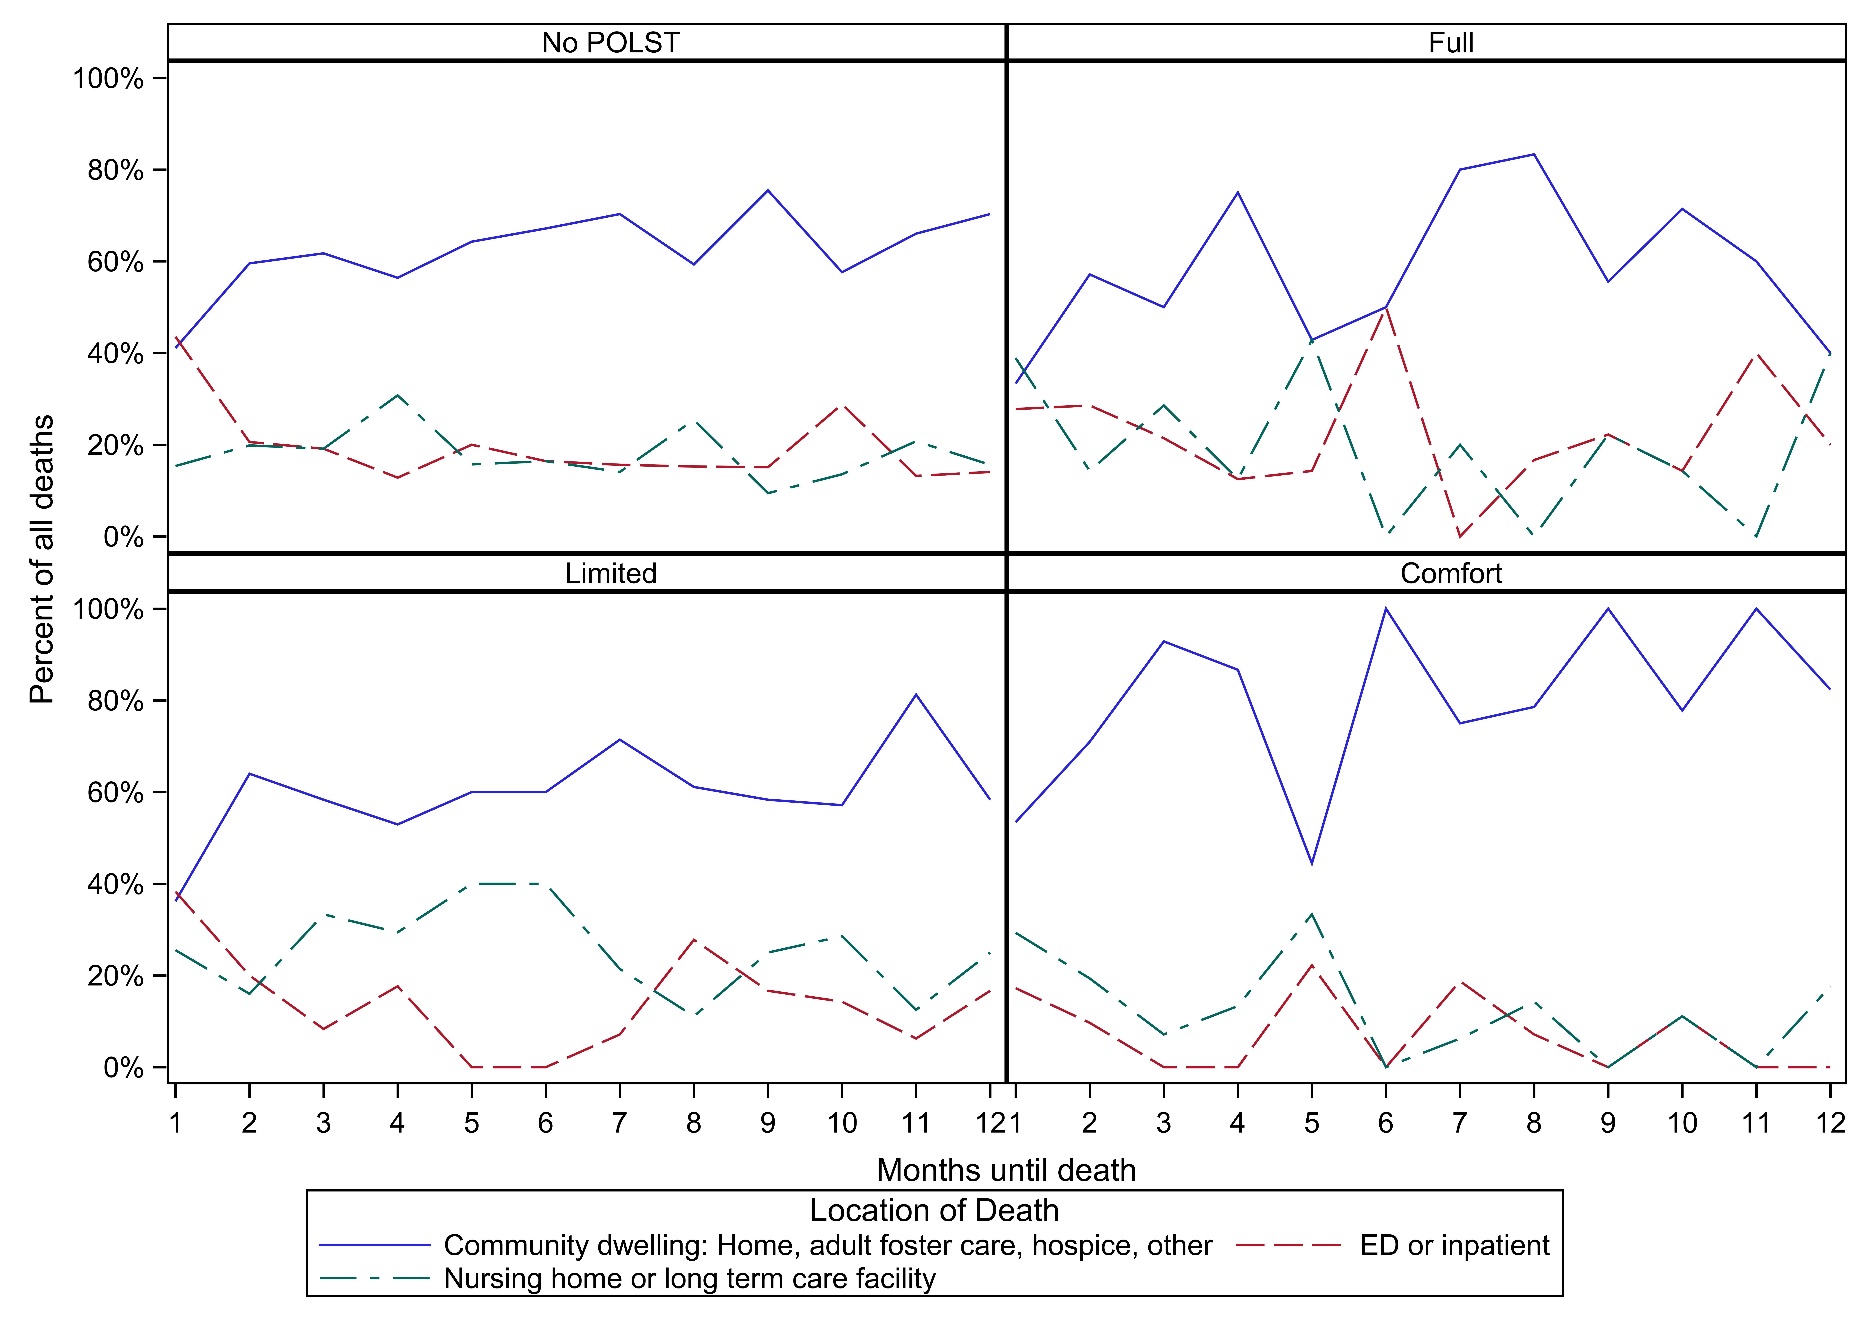


**Supplementary Figure S4.** Among injured older adults transported by EMS and dying within one year, the top 5 causes of death plotted over time by POLST status (n = 1,600).


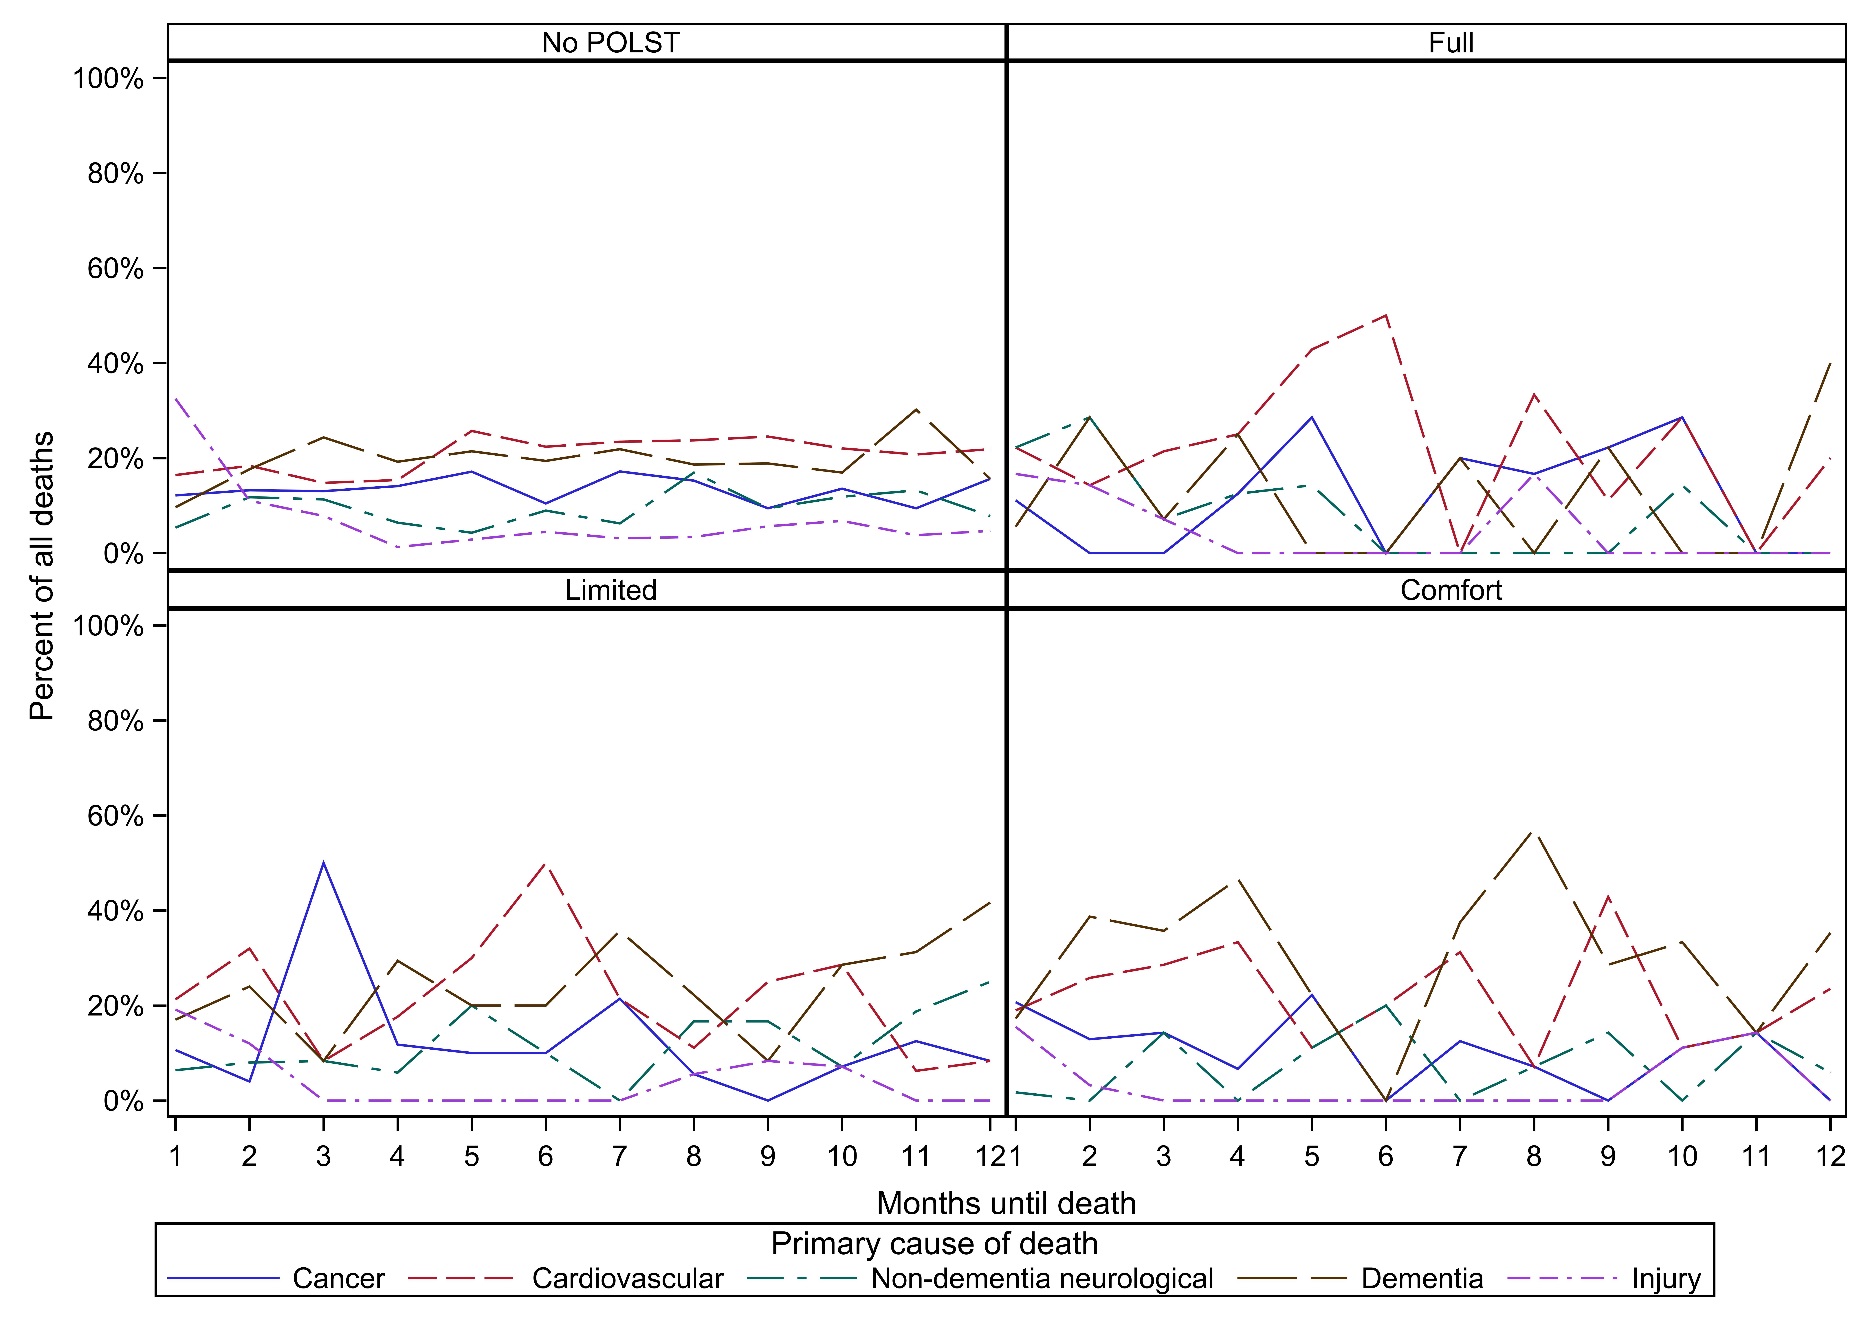


**Supplementary Figure S5.** Oregon POLST form.


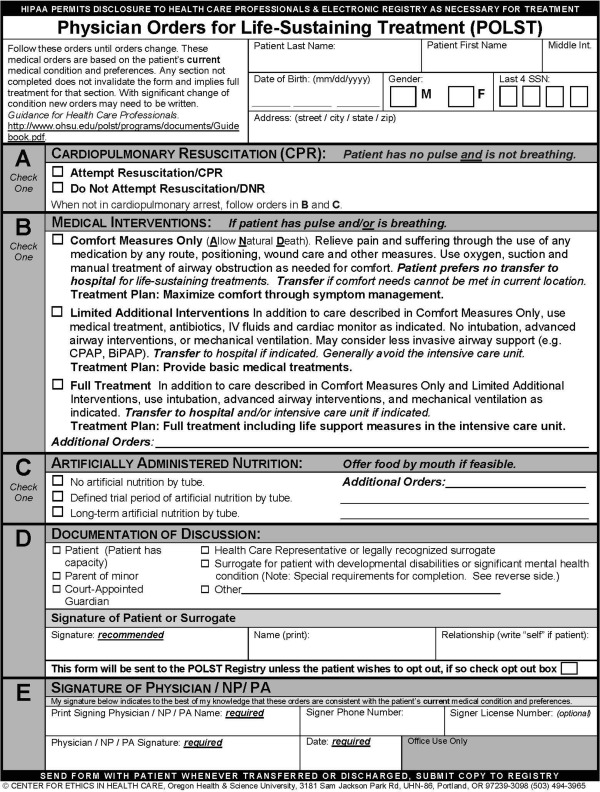

Supplement: Supplementary file 1 [file 15284513]
